# Supplementary material for: Network dimensionalities and thermal expansion properties of metal nitroprussides
Source: Royal Society of Chemistry journal article supplement (doi:10.1039/c1ra00547b), 2011-01-01
Supplement: c1ra00547b.pdf [file c1ra00547b.pdf]

## Electronic Supplementary Information

### Network dimensionalities and thermal expansion properties of metal nitroprussides

Tomoyuki Matsuda, Jungeun Kim and Yutaka Moritomo

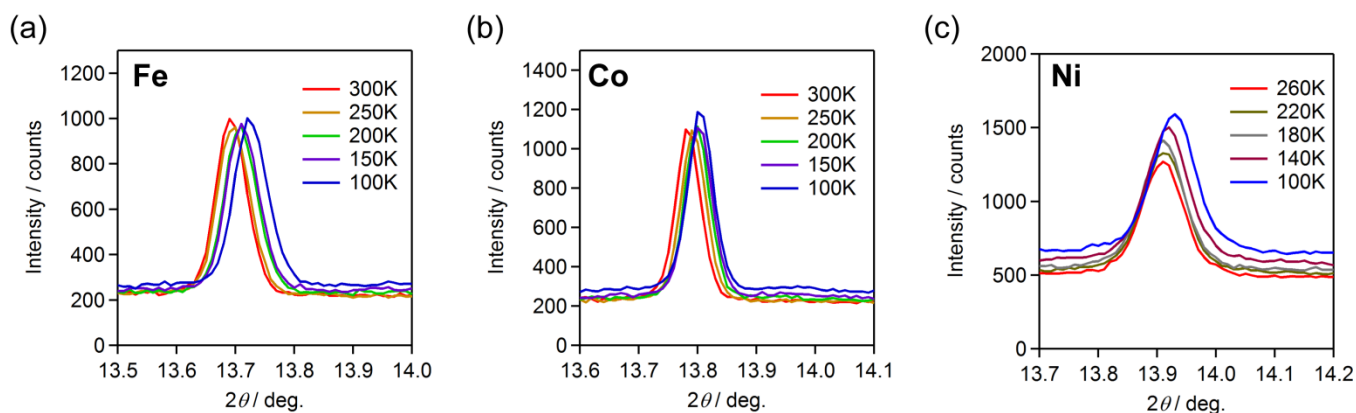

**Fig. S1** Temperature dependence of magnified X-ray powder diffraction patterns around 422 reflection for **Fe** (a), **Co** (b), and **Ni** (c).

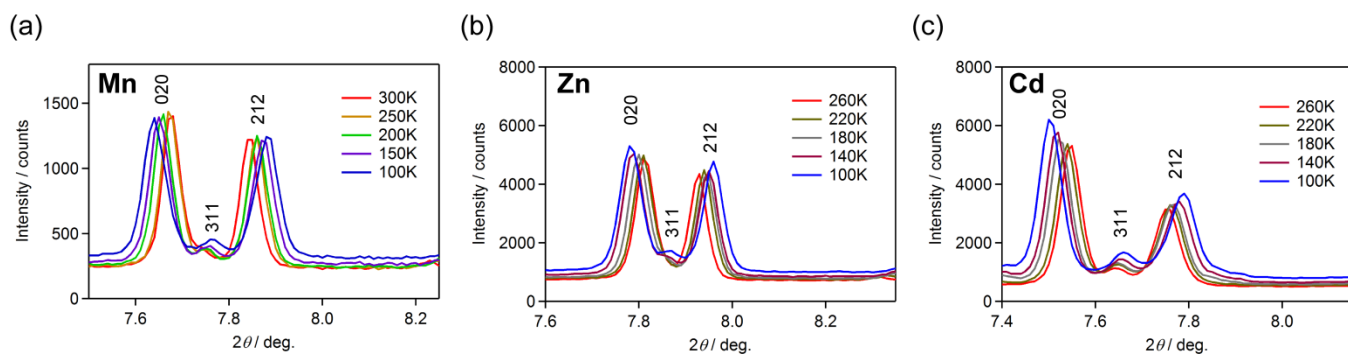

**Fig. S2** Temperature dependence of magnified X-ray powder diffraction patterns around 020, 311, and 212 reflections for **Mn** (a), **Zn** (b) and **Cd** (c).

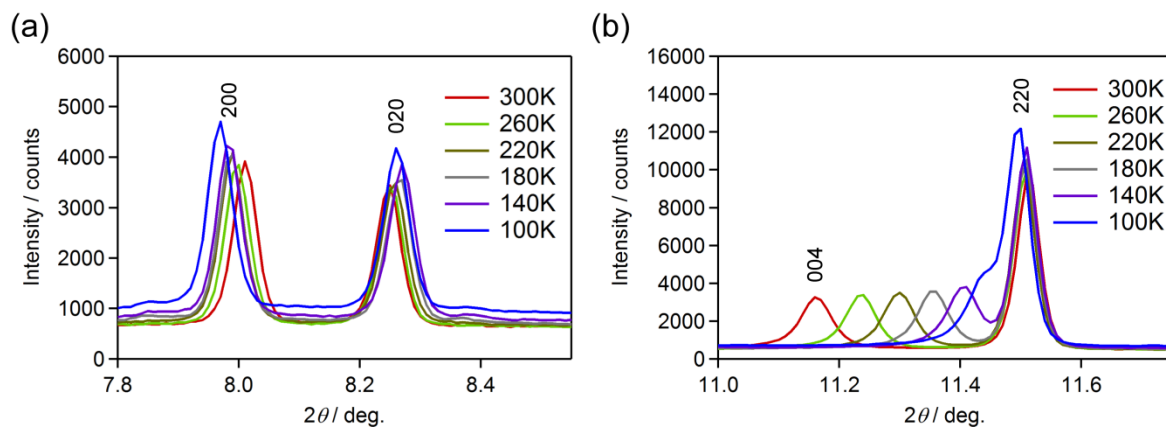

**Fig. S3** Temperature dependence of magnified X-ray powder diffraction patterns around 200 and 020 reflections (a), and 004 and 220 (b) reflections for Cu.
